# Supplementary material for: Impact of Smoking Status on Growth Differentiation Factor 15 and Mortality in Patients With Suspected or Known Coronary Artery Disease: The ANOX Study
Source: PubMed Central journal article supplement — J Am Heart Assoc. 2020 Nov 10;9(22):e018217. doi: 10.1161/JAHA.120.018217 (PMC7763732; doi:10.1161/jaha.120.018217), 2020-11-10

# **SUPPLEMENTAL MATERIAL**

## Appendix

**The other members of the ANOX study group are as follows:** National Hospital Organization Kyoto Medical Center, Kyoto, Japan: K. Takabayashi, H. Ogawa, Y. Yamashita, Y. Hamatani, Y. An, Y. Tezuka, K. Doi, K. Kashiwabara, M. Murakami, S. Ieda, Y. Ueji, M. Mori, Y. Harada, K. Takahashi, D. Ishikawa, T. Nakayama, H. Oi, T. Hitano, T. Inoue, T. Shinagawa, M. Kimura, and A. Wada; National Hospital Organization Saitama Hospital, Saitama, Japan: K. Matsumura, T. Katayama, Y. Miyabayashi, T. Sekine, N. Okada, and K. Namiki; National Hospital Organization Kure Medical Center and Chugoku Cancer Center, Kure, Japan: T. Kawamoto, R. Tamura, H. Nishiyama, O. Ichikawa, H. Kinoshita, T. Segawa, K. Yuasa, Y. Kimura, A. Kimura, M. Miura, and Y. Sumitani; National Hospital Organization Yokohama Medical Center, Yokohama, Japan: K. Iwade, F. Mori, Y. Seki, H. Hoshi, H. Kumakura, A. Yanane, and K. Shimizu; National Hospital Organization Sendai Medical Center, Sendai, Japan: G. Ishizuka, N. Ogami, N. Yamaguchi, and H. Fujita; National Hospital Organization Kanazawa Medical Center, Kanazawa, Japan: E. Nakai and J. Arai; National Hospital Organization Hakodate National Hospital, Hakodate, Japan: S. Anzai, H. Hirose, K. Komuro, K. Shimastu, H. Yamada, and K. Inoko; National Hospital Organization Kobe Medical Center, Kobe, Japan: T. Okada, M. Kinugasa, J. Mukai, and A. Suzuki; National Hospital Organization Ehime Medical Center, Toon, Japan: T. Fujita and N. Izumi; National Hospital Organization Hokkaido Medical Center, Sapporo, Japan: H. Okamoto, T. Kaneko, J. Teranishi, M. Satoh, M. Fujita, H. Komatsu, H. Mutou, T. Akagami, T. Honma, A. Kikuchi, M. Kato, K. Otsu, and F. Suzuki; National Hospital Organization Sagamihara National Hospital, Sagamihara, Japan: M. Kanna, T. Dejima, M. Nakayama, S. Kikuchi, Y. Okajima, and H. Tanaka; National Hospital Organization Kyushu Medical Center, Fukuoka, Japan: K. Hiyamuta, K. Numaguchi, M. Nishihara, Y. Kuwabara, and S. Tanaka; National Hospital Organization Okayama Medical Center, Okayama, Japan: A. Ogawa and S. Watanabe; National Hospital Organization Tochigi Medical Center, Utsunomiya, Japan: T. Adachi, H. Sakurai, and H. Akutsu.

**Table S1. Baseline characteristics according to the smoking status.**

| Baseline characteristics                  | Never smokers |              | Former smokers |              | Current smokers |              | P value* |
|-------------------------------------------|---------------|--------------|----------------|--------------|-----------------|--------------|----------|
|                                           | No.           | Value        | No.            | Value        | No.             | Value        |          |
| Stages of chronic kidney disease †        | 955           |              | 1035           |              | 428             |              | 0.353    |
| Stage 3a                                  |               | 229 (24.0)   |                | 258 (24.9)   |                 | 96 (22.4)    |          |
| Stage 3b                                  |               | 99 (10.4)    |                | 115 (11.1)   |                 | 33 (7.7)     |          |
| Stage 4                                   |               | 35 (3.7)     |                | 37 (3.6)     |                 | 11 (2.6)     |          |
| Stage 5                                   |               | 34 (3.6)     |                | 39 (3.8)     |                 | 13 (3.0)     |          |
| Dialysis                                  | 955           | 31 (3.3)     | 1035           | 36 (3.5)     | 428             | 13 (3.0)     | 0.903    |
| Multi-vessel or LMT disease               | 955           | 264 (27.6)   | 1035           | 373 (36.0)   | 428             | 157 (36.7)   | <0.001   |
| NYHA class III or IV                      | 955           | 113 (11.8)   | 1035           | 88 (8.5)     | 428             | 51 (11.9)    | 0.028    |
| Previous PCI                              | 955           | 192 (20.1)   | 1035           | 321 (31.0)   | 428             | 96 (22.4)    | <0.001   |
| Previous CABG                             | 955           | 32 (3.4)     | 1035           | 49 (4.7)     | 428             | 8 (1.9)      | 0.024    |
| Previous CAD (MI, PCI, or CABG)           | 955           | 226 (23.7)   | 1035           | 369 (35.7)   | 428             | 106 (24.8)   | <0.001   |
| Previous cardiovascular events‡           | 955           | 387 (40.5)   | 1035           | 538 (52.0)   | 428             | 173 (40.4)   | <0.001   |
| Family history of cardiovascular events   | 955           | 258 (27.0)   | 1035           | 320 (30.9)   | 428             | 113 (26.4)   | 0.086    |
| Systolic blood pressure, mean (SD), mmHg  | 955           | 126 (18)     | 1035           | 128 (18)     | 428             | 126 (18)     | 0.113    |
| Diastolic blood pressure, mean (SD), mmHg | 955           | 70 (12)      | 1035           | 70 (12)      | 428             | 71 (13)      | 0.368    |
| Pulse rate, mean (SD), beats per minute   | 955           | 70 (14)      | 1035           | 70 (13)      | 428             | 70 (13)      | 0.951    |
| LDL-cholesterol, mean (SD), mg/dL         | 932           | 107 (32)     | 1013           | 102 (29)     | 421             | 107 (32)     | <0.001   |
| HDL-cholesterol, mean (SD), mg/dL         | 925           | 58 (17)      | 1010           | 53 (15)      | 418             | 50 (15)      | <0.001   |
| Triglycerides, median (IQR), mg/dL        | 938           | 104 (75-146) | 1019           | 115 (82-166) | 425             | 125 (94-189) | <0.001   |
| Fasting glucose, median (IQR), mg/dL      | 938           | 108 (95-135) | 1024           | 111 (97-144) | 419             | 111 (96-147) | 0.022    |

|                                 |     |               |      |               |     |               |        |
|---------------------------------|-----|---------------|------|---------------|-----|---------------|--------|
| Hemoglobin A1c, median (IQR), % | 899 | 6.0 (5.6-6.9) | 989  | 6.1 (5.7-7.1) | 418 | 6.1 (5.6-7.1) | 0.033  |
| Creatinine, median (IQR), mg/dL | 955 | 0.8 (0.6-1.0) | 1035 | 0.9 (0.8-1.1) | 428 | 0.9 (0.7-1.0) | <0.001 |
| Hemoglobin, mean (SD), g/dL     | 952 | 12.6 (1.7)    | 1033 | 13.1 (1.8)    | 427 | 13.5 (2.0)    | <0.001 |
| Hematocrit, mean (SD), %        | 951 | 38.0 (5.0)    | 1033 | 39.4 (5.2)    | 427 | 40.5 (5.9)    | <0.001 |
| Uric acid, mean (SD), mg/dL     | 928 | 5.7 (1.7)     | 1004 | 6.0 (1.7)     | 415 | 6.2 (1.8)     | <0.001 |
| Anti-hypertensive drug use      |     |               |      |               |     |               |        |
| RASI                            | 955 | 554 (58.0)    | 1035 | 626 (60.5)    | 428 | 252 (58.9)    | 0.527  |
| ACEI                            | 955 | 135 (14.1)    | 1035 | 176 (17.0)    | 428 | 77 (18.0)     | 0.106  |
| ARB                             | 955 | 440 (46.1)    | 1035 | 474 (45.8)    | 428 | 189 (44.2)    | 0.794  |
| β-blocker                       | 955 | 291 (30.5)    | 1035 | 297 (28.7)    | 428 | 127 (29.7)    | 0.686  |
| Any lipid-lowering drug use     | 955 | 537 (56.2)    | 1035 | 610 (58.9)    | 428 | 235 (54.9)    | 0.278  |
| Any hypoglycemic drug use       | 955 | 273 (28.6)    | 1035 | 342 (33.0)    | 428 | 145 (33.9)    | 0.049  |
| Oral hypoglycemic drugs         | 955 | 223 (23.4)    | 1035 | 272 (26.3)    | 428 | 108 (25.2)    | 0.316  |
| Insulin                         | 955 | 103 (10.8)    | 1035 | 124 (12.0)    | 428 | 58 (13.6)     | 0.326  |
| Any anti-platelet drug use      | 955 | 541 (56.7)    | 1035 | 706 (68.2)    | 428 | 262 (61.2)    | <0.001 |
| Any anti-coagulant drugs        | 955 | 155 (16.2)    | 1035 | 166 (16.0)    | 428 | 62 (14.5)     | 0.695  |
| Warfarin                        | 955 | 128 (13.4)    | 1035 | 147 (14.2)    | 428 | 57 (13.3)     | 0.842  |

Values are expressed as number (percentage) unless otherwise indicated. LMT indicates left main trunk; NYHA, New York Heart Association; PCI, percutaneous coronary intervention; CABG, coronary artery bypass grafting; SD, standard deviation; LDL, low-density lipoprotein; HDL, high-density lipoprotein; IQR, interquartile range; RASI, renin angiotensin system inhibitors; ACEI, angiotensin converting enzyme inhibitors; ARB, angiotensin receptor blockers. \*The *P* value is for comparison between groups, and is based on the  $\chi^2$  test of independence for categorical variables, and the analysis of variance or Kruskal-Wallis for continuous variables. †Chronic kidney disease is defined as an estimated glomerular filtration rate (eGFR) of less than 60 ml/min/1.73 m<sup>2</sup> of body surface area. eGFRs of stages 3a, 3b, 4, and 5 are defined as follows: stage 3a, 45–59 ml/min/1.73 m<sup>2</sup>; stage 3b, 30–44 ml/min/1.73 m<sup>2</sup>; stage 4, 15–29 ml/min/1.73 m<sup>2</sup>; stage 5, ≤14ml/min/1.73 m<sup>2</sup>. \* Previous cardiovascular events include myocardial infarction, stroke, heart failure hospitalization, and coronary revascularization

**Table S2. Baseline characteristics and incidence of outcomes according to quartiles of GDF-15 in the entire cohort.**

| Baseline characteristics and incidence of events | Quartile 1 |                | Quartile 2 |                 | Quartile 3 |                 | Quartile 4 |                 | P value* |
|--------------------------------------------------|------------|----------------|------------|-----------------|------------|-----------------|------------|-----------------|----------|
|                                                  | No.        | Value          | No.        | Value           | No.        | Value           | No.        | Value           |          |
| <i>Baseline characteristics</i>                  |            |                |            |                 |            |                 |            |                 |          |
| Age, mean (SD), y                                | 605        | 63.6 (11.5)    | 604        | 70.5 (9.0)      | 604        | 73.9 (8.0)      | 605        | 74.3 (9.3)      | <0.001   |
| Male                                             | 605        | 376 (62.2)     | 604        | 402 (66.6)      | 604        | 424 (70.2)      | 605        | 422 (69.8)      | 0.010    |
| Body mass index, mean (SD)                       | 605        | 24.6 (3.8)     | 604        | 24.5 (4.0)      | 604        | 24.2 (3.8)      | 605        | 23.5 (4.0)      | <0.001   |
| Obesity <sup>†</sup>                             | 605        | 253 (41.8)     | 604        | 242 (40.1)      | 604        | 231 (38.3)      | 605        | 210 (34.7)      | 0.070    |
| Hypertension                                     | 605        | 421 (69.6)     | 604        | 457 (75.7)      | 604        | 472 (78.2)      | 605        | 493 (81.5)      | <0.001   |
| Dyslipidemia                                     | 605        | 387 (64.0)     | 604        | 383 (63.4)      | 604        | 381 (63.1)      | 605        | 315 (52.1)      | <0.001   |
| Diabetes                                         | 605        | 204 (33.7)     | 604        | 262 (43.4)      | 604        | 278 (46.0)      | 605        | 343 (56.7)      | <0.001   |
| Current smoker                                   | 605        | 97 (16.0)      | 604        | 104 (17.2)      | 604        | 111 (18.4)      | 605        | 116 (19.2)      | 0.505    |
| Former smoker                                    | 605        | 224 (37.0)     | 604        | 257 (42.6)      | 604        | 295 (48.8)      | 605        | 259 (42.8)      | <0.001   |
| eGFR, mean (SD), ml/min/1.73 m <sup>2</sup>      | 605        | 76.7 (17.5)    | 604        | 68.5 (17.3)     | 604        | 62.1 (16.3)     | 605        | 45.8 (24.3)     | <0.001   |
| Chronic kidney disease <sup>‡</sup>              | 605        | 90 (14.9)      | 604        | 191 (31.6)      | 604        | 280 (46.4)      | 605        | 438 (72.4)      | <0.001   |
| Stages of chronic kidney disease                 | 605        |                | 604        |                 | 604        |                 | 605        |                 | <0.001   |
| Stage 3a                                         |            | 76 (12.6)      |            | 157 (26.0)      |            | 197 (32.6)      |            | 153 (25.3)      |          |
| Stage 3b                                         |            | 14 (2.3)       |            | 29 (4.8)        |            | 77 (12.8)       |            | 127 (21.0)      |          |
| Stage 4                                          |            | 0 (0.0)        |            | 3 (0.5)         |            | 6 (1.0)         |            | 74 (12.2)       |          |
| Stage 5                                          |            | 0 (0.0)        |            | 2 (0.3)         |            | 0 (0.0)         |            | 84 (13.9)       |          |
| Dialysis                                         | 605        | 0 (0.0)        | 604        | 1 (0.2)         | 604        | 0 (0.0)         | 605        | 79 (13.1)       | <0.001   |
| Gensini score, median (IQR) <sup>§</sup>         | 605        | 7.0 (0.0-24.3) | 604        | 11.5 (2.5-34.0) | 604        | 15.0 (4.0-39.9) | 605        | 15.5 (4.0-47.5) | <0.001   |
| Obstructive CAD                                  | 605        | 288 (47.6)     | 604        | 348 (57.6)      | 604        | 374 (61.9)      | 605        | 382 (63.1)      | <0.001   |

|                                             |     |              |     |              |     |              |     |              |        |
|---------------------------------------------|-----|--------------|-----|--------------|-----|--------------|-----|--------------|--------|
| Multi-vessel or LMT disease                 | 605 | 149 (24.6)   | 604 | 180 (29.8)   | 604 | 218 (36.1)   | 605 | 247 (40.8)   | <0.001 |
| NYHA class III or IV                        | 605 | 27 (4.5)     | 604 | 46 (7.6)     | 604 | 57 (9.4)     | 605 | 122 (20.2)   | <0.001 |
| Atrial fibrillation                         | 605 | 30 (5.0)     | 604 | 53 (8.8)     | 604 | 72 (11.9)    | 605 | 106 (17.5)   | <0.001 |
| Malignancies                                | 605 | 39 (6.5)     | 604 | 47 (7.8)     | 604 | 64 (10.6)    | 605 | 76 (12.6)    | 0.001  |
| Anemia <sup>ll</sup>                        | 605 | 95 (15.7)    | 604 | 152 (25.2)   | 604 | 232 (38.4)   | 605 | 403 (66.6)   | <0.001 |
| Previous MI                                 | 605 | 75 (12.4)    | 604 | 93 (15.4)    | 604 | 89 (14.7)    | 605 | 97 (16.0)    | 0.301  |
| Previous PCI                                | 605 | 133 (22.0)   | 604 | 167 (27.7)   | 604 | 168 (27.8)   | 605 | 141 (23.3)   | 0.035  |
| Previous CABG                               | 605 | 13 (2.2)     | 604 | 15 (2.5)     | 604 | 21 (3.5)     | 605 | 40 (6.6)     | <0.001 |
| Previous CAD (MI, PCI, or CABG)             | 605 | 147 (24.3)   | 604 | 184 (30.5)   | 604 | 189 (31.3)   | 605 | 181 (29.9)   | 0.030  |
| Previous stroke                             | 605 | 51 (8.4)     | 604 | 91 (15.1)    | 604 | 97 (16.1)    | 605 | 114 (18.8)   | <0.001 |
| Precious CHF hospitalization                | 605 | 23 (3.8)     | 604 | 41 (6.8)     | 604 | 56 (9.3)     | 605 | 133 (22.0)   | <0.001 |
| Previous cardiovascular events <sup>#</sup> | 605 | 210 (34.7)   | 604 | 283 (46.9)   | 604 | 283 (46.9)   | 605 | 322 (53.2)   | <0.001 |
| Family history of cardiovascular events     | 605 | 193 (31.9)   | 604 | 183 (30.3)   | 604 | 174 (28.8)   | 605 | 141 (23.3)   | 0.006  |
| Systolic blood pressure, mean (SD), mmHg    | 605 | 127 (17)     | 604 | 127 (18)     | 604 | 126 (18)     | 605 | 127 (20)     | 0.900  |
| Diastolic blood pressure, mean (SD), mmHg   | 605 | 73 (12)      | 604 | 71 (13)      | 604 | 70 (12)      | 605 | 69 (12)      | <0.001 |
| Pulse rate, mean (SD), beats per minute     | 605 | 68 (11)      | 604 | 70 (14)      | 604 | 70 (13)      | 605 | 73 (14)      | <0.001 |
| LDL-cholesterol, mean (SD), mg/dL           | 581 | 112 (31)     | 593 | 107 (29)     | 598 | 104 (30)     | 594 | 96 (30)      | <0.001 |
| HDL-cholesterol, mean (SD), mg/dL           | 587 | 56 (16)      | 593 | 55 (16)      | 585 | 54 (16)      | 588 | 52 (16)      | <0.001 |
| Triglycerides, median (IQR), mg/dL          | 592 | 125 (88-186) | 596 | 115 (83-163) | 596 | 109 (80-156) | 598 | 101 (74-144) | <0.001 |

|                                      |     |               |     |                  |     |                  |     |                  |        |
|--------------------------------------|-----|---------------|-----|------------------|-----|------------------|-----|------------------|--------|
| Fasting glucose, median (IQR), mg/dL | 594 | 107 (95-131)  | 595 | 111 (96-144)     | 598 | 112 (98-140)     | 594 | 112 (94-149)     | 0.027  |
| Hemoglobin A1c, median (IQR), %      | 570 | 5.9 (5.6-6.6) | 578 | 6.1 (5.7-7.1)    | 586 | 6.1 (5.7-7.0)    | 572 | 6.2 (5.7-7.1)    | <0.001 |
| Creatinine, median (IQR), mg/dL      | 605 | 0.7 (0.6-0.9) | 604 | 0.8 (0.7-0.9)    | 604 | 0.9 (0.7-1.0)    | 605 | 1.1 (0.9-1.6)    | <0.001 |
| Hemoglobin, mean (SD), g/dL          | 604 | 13.8 (1.4)    | 600 | 13.5 (1.5)       | 604 | 13.0 (1.6)       | 604 | 11.7 (2.0)       | <0.001 |
| Hematocrit, mean (SD), %             | 604 | 41.1 (4.2)    | 600 | 40.3 (4.5)       | 604 | 39.1 (4.7)       | 603 | 35.5 (6.0)       | <0.001 |
| Uric acid, mean (SD), mg/dL          | 588 | 5.6 (1.5)     | 589 | 5.7 (1.6)        | 591 | 6.0 (1.7)        | 579 | 6.4 (1.9)        | <0.001 |
| NT-proBNP, median (IQR), pg/mL       | 605 | 91 (41-210)   | 604 | 151 (61-434)     | 604 | 210 (88-726)     | 605 | 886 (247-2782)   | <0.001 |
| cTnl, median (IQR), pg/mL            | 605 | 0.0 (0.0–1.0) | 604 | 0.0 (0.0–6.0)    | 604 | 0.0 (0.0–11.0)   | 605 | 9.0 (0.0–33.5)   | <0.001 |
| hs-CRP, median (IQR), mg/L           | 605 | 0.5 (0.2-1.6) | 604 | 0.8 (0.3-2.2)    | 604 | 1.1 (0.3-3.3)    | 605 | 2.0 (0.5-6.2)    | <0.001 |
| GDF-15, median (IQR), pg/mL          | 605 | 690 (549-803) | 604 | 1102 (1010-1206) | 604 | 1561 (1440-1740) | 605 | 2774 (2247-4160) | <0.001 |
| Anti-hypertensive drug use           | 605 | 456 (75.4)    | 604 | 489 (81.0)       | 604 | 492 (81.5)       | 605 | 530 (87.6)       | <0.001 |
| RASI                                 | 605 | 302 (49.9)    | 604 | 347 (57.5)       | 604 | 371 (61.4)       | 605 | 412 (68.1)       | <0.001 |
| ACEI                                 | 605 | 76 (12.6)     | 604 | 87 (14.4)        | 604 | 94 (15.6)        | 605 | 131 (21.7)       | <0.001 |
| ARB                                  | 605 | 234 (38.7)    | 604 | 268 (44.4)       | 604 | 285 (47.2)       | 605 | 316 (52.2)       | <0.001 |
| β-blocker                            | 605 | 150 (24.8)    | 604 | 186 (30.8)       | 604 | 166 (27.5)       | 605 | 213 (35.2)       | <0.001 |
| Any lipid-lowering drug use          | 605 | 346 (57.2)    | 604 | 352 (58.3)       | 604 | 362 (59.9)       | 605 | 322 (53.2)       | 0.110  |
| Statin use                           | 605 | 310 (51.2)    | 604 | 318 (52.7)       | 604 | 319 (52.8)       | 605 | 275 (45.5)       | 0.034  |
| Any hypoglycemic drug use            | 605 | 149 (24.6)    | 604 | 185 (30.6)       | 604 | 202 (33.4)       | 605 | 224 (37.0)       | <0.001 |
| Oral hypoglycemic drugs              | 605 | 126 (20.8)    | 604 | 155 (25.7)       | 604 | 162 (26.8)       | 605 | 160 (26.5)       | 0.057  |
| Insulin                              | 605 | 45 (7.4)      | 604 | 68 (11.3)        | 604 | 69 (11.4)        | 605 | 103 (17.0)       | <0.001 |
| Any anti-platelet drug use           | 605 | 362 (59.8)    | 604 | 396 (65.6)       | 604 | 386 (63.9)       | 605 | 365 (60.3)       | 0.114  |
| Aspirin use                          | 605 | 340 (56.2)    | 604 | 349 (57.8)       | 604 | 337 (55.8)       | 605 | 314 (51.9)       | 0.205  |
| Any anti-coagulant drugs             | 605 | 54 (8.9)      | 604 | 82 (13.6)        | 604 | 108 (17.9)       | 605 | 139 (23.0)       | <0.001 |

|                                                      |     |           |     |           |     |           |     |             |        |
|------------------------------------------------------|-----|-----------|-----|-----------|-----|-----------|-----|-------------|--------|
| Warfarin                                             | 605 | 44 (7.3)  | 604 | 69 (11.4) | 604 | 92 (15.2) | 605 | 127 (21.0)  | <0.001 |
| <i>Incidence of events, no. (/1000 person-years)</i> |     |           |     |           |     |           |     |             |        |
| All-cause death                                      | 605 | 20 (11.3) | 604 | 22 (12.4) | 604 | 51 (29.1) | 605 | 161 (102.6) | –      |
| Cardiovascular death                                 | 605 | 6 (3.4)   | 604 | 8 (4.5)   | 604 | 12 (6.9)  | 605 | 62 (39.5)   | –      |
| Myocardial infarction                                | 605 | 3 (1.7)   | 604 | 3 (1.7)   | 604 | 6 (3.4)   | 605 | 9 (5.8)     | –      |
| Stroke                                               | 605 | 17 (9.7)  | 604 | 15 (8.6)  | 604 | 13 (7.5)  | 605 | 24 (15.5)   | –      |
| First MACE**                                         | 605 | 25 (14.3) | 604 | 25 (14.3) | 604 | 29 (16.8) | 605 | 86 (55.9)   | –      |

Values are expressed as number (percentage) unless otherwise indicated. The quartiles of GDF-15 levels were as follows: quartile 1,  $\leq 902.0$ ; quartile 2, 902.6–1322.1; quartile 3, 1322.5–1980.2; quartile 4,  $\geq 1980.3$  pg/mL. GDF-15 indicates growth differentiation factor-15; SD, standard deviation; eGFR, estimated glomerular filtration rate; CAD, coronary artery disease; IQR, interquartile range; LMT, left main trunk; NYHA, New York Heart Association; MI, myocardial infarction; PCI, percutaneous coronary intervention; CABG, coronary artery bypass grafting; CHF, congestive heart failure; NT-proBNP, N-terminal pro-brain natriuretic peptide; cTnI, contemporary sensitive cardiac troponin I; hs-CRP, high-sensitivity C-reactive protein; LDL, low-density lipoprotein; HDL, high-density lipoprotein; RASI, renin angiotensin system inhibitors; ACEI, angiotensin converting enzyme inhibitors; ARB, angiotensin receptor blockers; MACE, major adverse cardiovascular events.

\*The *P* value is for comparison between groups, and is based on the  $\chi^2$  test of independence for categorical variables, and the analysis of variance or Kruskal-Wallis for continuous variables.

†Obesity is defined as a body mass index of 25 or more.

‡Chronic kidney disease is defined as an estimated GFR of less than 60 ml/min/1.73 m<sup>2</sup> of body surface area. eGFRs of stages 3a, 3b, 4, and 5 are defined as follows: stage 3a, 45–59 ml/min/1.73 m<sup>2</sup>; stage 3b, 30–44 ml/min/1.73 m<sup>2</sup>; stage 4, 15–29 ml/min/1.73 m<sup>2</sup>; stage 5,  $\leq 14$  ml/min/1.73 m<sup>2</sup>.

§The Gensini score represents the angiographic severity of coronary artery disease employing a nonlinear points system for degree of luminal narrowing.

||Anemia is defined as a hemoglobin level of less than 13 g/dL in men and less than 12 g/dL in women.

#Previous cardiovascular events include myocardial infarction, stroke, heart failure hospitalization, and coronary revascularization.

\*\*MACE is defined as a composite of cardiovascular death, nonfatal myocardial infarction, and nonfatal stroke.



**Table S3. Baseline characteristics and incidence of outcomes according to quartiles of GDF-15 in never smokers.**

| Baseline characteristics and incidence of events | Quartile 1 |             | Quartile 2 |             | Quartile 3 |             | Quartile 4 |             | P value* |
|--------------------------------------------------|------------|-------------|------------|-------------|------------|-------------|------------|-------------|----------|
|                                                  | No.        | Value       | No.        | Value       | No.        | Value       | No.        | Value       |          |
| <i>Baseline characteristics</i>                  |            |             |            |             |            |             |            |             |          |
| Age, mean (SD), y                                | 239        | 64.1 (11.8) | 238        | 71.9 (8.7)  | 239        | 75.0 (8.3)  | 239        | 75.0 (10.1) | <0.001   |
| Male                                             | 239        | 91 (38.1)   | 238        | 89 (37.4)   | 239        | 94 (39.3)   | 239        | 97 (40.6)   | 0.897    |
| Body mass index, mean (SD)                       | 239        | 24.3 (4.3)  | 238        | 24.3 (3.9)  | 239        | 24.0 (3.9)  | 239        | 23.7 (4.4)  | 0.257    |
| Obesity <sup>†</sup>                             | 239        | 96 (40.2)   | 238        | 92 (38.7)   | 239        | 86 (36.0)   | 239        | 91 (38.1)   | 0.823    |
| Hypertension                                     | 239        | 162 (67.8)  | 238        | 175 (73.5)  | 239        | 179 (74.9)  | 239        | 188 (78.7)  | 0.057    |
| Dyslipidemia                                     | 239        | 136 (56.9)  | 238        | 148 (62.2)  | 239        | 163 (68.2)  | 239        | 116 (48.5)  | <0.001   |
| Diabetes                                         | 239        | 68 (28.5)   | 238        | 88 (37.0)   | 239        | 100 (41.8)  | 239        | 133 (55.7)  | <0.001   |
| Current smoker                                   | 239        | 0 (0.0)     | 238        | 0 (0.0)     | 239        | 0 (0.0)     | 239        | 0 (0.0)     | –        |
| Former smoker                                    | 239        | 0 (0.0)     | 238        | 0 (0.0)     | 239        | 0 (0.0)     | 239        | 0 (0.0)     | –        |
| eGFR, mean (SD), ml/min/1.73 m <sup>2</sup>      | 239        | 76.5 (16.9) | 238        | 68.5 (16.9) | 239        | 61.1 (16.6) | 239        | 44.9 (24.1) | <0.001   |
| Chronic kidney disease <sup>‡</sup>              | 239        | 36 (15.1)   | 238        | 78 (32.8)   | 239        | 108 (45.2)  | 239        | 175 (73.2)  | <0.001   |
| Stages of chronic kidney disease                 | 239        |             | 238        |             | 239        |             | 239        |             | <0.001   |
| Stage 3a                                         |            | 30 (12.6)   |            | 66 (27.7)   |            | 77 (32.2)   |            | 56 (23.4)   |          |
| Stage 3b                                         |            | 6 (2.5)     |            | 12 (5.0)    |            | 26 (10.9)   |            | 55 (23.0)   |          |
| Stage 4                                          |            | 0 (0.0)     |            | 0 (0.0)     |            | 5 (2.1)     |            | 30 (12.6)   |          |
| Stage 5                                          |            | 0 (0.0)     |            | 0 (0.0)     |            | 0 (0.0)     |            | 34 (14.2)   |          |
| Dialysis                                         | 239        | 0 (0.0)     | 238        | 0 (0.0)     | 239        | 0 (0.0)     | 239        | 31 (13.0)   | <0.001   |
| Obstructive CAD                                  | 239        | 93 (38.9)   | 238        | 117 (49.2)  | 239        | 137 (57.3)  | 239        | 143 (59.8)  | <0.001   |
| Multi-vessel or LMT disease                      | 239        | 40 (16.7)   | 238        | 57 (24.0)   | 239        | 82 (34.3)   | 239        | 85 (35.6)   | <0.001   |

|                                             |     |                |     |                |     |                 |     |                 |        |
|---------------------------------------------|-----|----------------|-----|----------------|-----|-----------------|-----|-----------------|--------|
| Gensini score, median (IQR) <sup>§</sup>    | 239 | 3.0 (0.0-19.0) | 238 | 7.0 (1.0-21.1) | 239 | 12.0 (3.0-36.5) | 239 | 13.0 (3.0-42.5) | <0.001 |
| NYHA class III or IV                        | 239 | 15 (6.3)       | 238 | 16 (6.7)       | 239 | 30 (12.6)       | 239 | 52 (21.8)       | <0.001 |
| Atrial fibrillation                         | 239 | 9 (3.8)        | 238 | 23 (9.7)       | 239 | 37 (15.5)       | 239 | 48 (20.1)       | <0.001 |
| Malignancies                                | 239 | 16 (6.7)       | 238 | 17 (7.1)       | 239 | 11 (4.6)        | 239 | 24 (10.0)       | 0.142  |
| Anemia <sup>  </sup>                        | 239 | 37 (15.5)      | 238 | 70 (29.4)      | 239 | 94 (39.3)       | 239 | 164 (68.6)      | <0.001 |
| Previous MI                                 | 239 | 19 (8.0)       | 238 | 24 (10.1)      | 239 | 28 (11.7)       | 239 | 27 (11.3)       | 0.528  |
| Previous PCI                                | 239 | 45 (18.8)      | 238 | 52 (21.9)      | 239 | 54 (22.6)       | 239 | 41 (17.2)       | 0.406  |
| Previous CABG                               | 239 | 2 (0.8)        | 238 | 5 (2.1)        | 239 | 7 (2.9)         | 239 | 18 (7.5)        | <0.001 |
| Previous CAD (MI, PCI, or CABG)             | 239 | 48 (20.1)      | 238 | 58 (24.4)      | 239 | 63 (26.4)       | 239 | 57 (23.9)       | 0.436  |
| Previous stroke                             | 239 | 17 (7.1)       | 238 | 21 (8.8)       | 239 | 33 (13.8)       | 239 | 45 (18.8)       | <0.001 |
| Precious CHF hospitalization                | 239 | 11 (4.6)       | 238 | 18 (7.6)       | 239 | 23 (9.6)        | 239 | 61 (25.5)       | <0.001 |
| Previous cardiovascular events <sup>#</sup> | 239 | 72 (30.1)      | 238 | 90 (37.8)      | 239 | 102 (42.7)      | 239 | 123 (51.5)      | <0.001 |
| Family history of cardiovascular events     | 239 | 72 (30.1)      | 238 | 66 (27.7)      | 239 | 65 (27.2)       | 239 | 55 (23.0)       | 0.365  |
| Systolic blood pressure, mean (SD), mmHg    | 239 | 126 (16)       | 238 | 126 (17)       | 239 | 126 (17)        | 239 | 127 (21)        | 0.846  |
| Diastolic blood pressure, mean (SD), mmHg   | 239 | 72 (12)        | 238 | 71 (13)        | 239 | 69 (12)         | 239 | 69 (13)         | <0.001 |
| Pulse rate, mean (SD), beats per minute     | 239 | 69 (12)        | 238 | 70 (12)        | 239 | 70 (17)         | 239 | 73 (14)         | 0.036  |
| LDL-cholesterol, mean (SD), mg/dL           | 232 | 113 (31)       | 233 | 110 (29)       | 235 | 106 (33)        | 232 | 97 (33)         | <0.001 |
| HDL-cholesterol, mean (SD), mg/dL           | 232 | 62 (17)        | 233 | 58 (16)        | 231 | 56 (17)         | 229 | 54 (17)         | <0.001 |
| Triglycerides, median (IQR), mg/dL          | 233 | 115 (79-168)   | 235 | 110 (79-148)   | 235 | 100 (75-141)    | 235 | 94 (69-129)     | 0.001  |

|                                      |     |               |     |                 |     |                  |     |                  |        |
|--------------------------------------|-----|---------------|-----|-----------------|-----|------------------|-----|------------------|--------|
| Fasting glucose, median (IQR), mg/dL | 239 | 106 (94-134)  | 231 | 108 (97-131)    | 234 | 109 (94-134)     | 234 | 112 (95-147)     | 0.811  |
| Hemoglobin A1c, median (IQR), %      | 225 | 5.8 (5.5-6.3) | 224 | 6.1 (5.6-6.9)   | 229 | 6.0 (5.6-7.0)    | 221 | 6.2 (5.7-7.1)    | <0.001 |
| Creatinine, median (IQR), mg/dL      | 239 | 0.7 (0.6-0.8) | 238 | 0.7 (0.6-0.9)   | 239 | 0.8 (0.7-1.0)    | 239 | 1.0 (0.8-1.5)    | <0.001 |
| Hemoglobin, mean (SD), g/dL          | 239 | 13.5 (1.3)    | 236 | 13.0 (1.5)      | 239 | 12.7 (1.6)       | 238 | 11.4 (1.9)       | <0.001 |
| Hematocrit, mean (SD), %             | 239 | 40.2 (3.7)    | 236 | 39.0 (4.2)      | 239 | 38.0 (4.6)       | 237 | 34.6 (5.6)       | <0.001 |
| Uric acid, mean (SD), mg/dL          | 234 | 5.2 (1.5)     | 232 | 5.4 (1.5)       | 235 | 5.9 (1.6)        | 227 | 6.3 (1.9)        | <0.001 |
| NT-proBNP, median (IQR), pg/mL       | 239 | 98 (42-194)   | 238 | 140 (54-353)    | 239 | 252 (98-1039)    | 239 | 977 (253-3190)   | <0.001 |
| cTnl, median (IQR), pg/mL            | 239 | 0.0 (0.0-0.0) | 238 | 0.0 (0.0-4.0)   | 239 | 0.0 (0.0-9.0)    | 239 | 9.0 (0.0-34.0)   | <0.001 |
| hs-CRP, median (IQR), mg/L           | 239 | 0.5 (0.2-1.3) | 238 | 0.7 (0.3-2.0)   | 239 | 0.9 (0.3-3.2)    | 239 | 1.9 (0.5-5.4)    | <0.001 |
| GDF-15, median (IQR), pg/mL          | 239 | 647 (510-750) | 238 | 1031 (932-1134) | 239 | 1466 (1349-1652) | 239 | 2823 (2249-4159) | <0.001 |
| Anti-hypertensive drug use           | 239 | 178 (74.5)    | 238 | 191 (80.3)      | 239 | 200 (83.7)       | 239 | 210 (87.9)       | 0.002  |
| RASI                                 | 239 | 117 (49.0)    | 238 | 124 (52.1)      | 239 | 145 (60.7)       | 239 | 168 (70.3)       | <0.001 |
| ACEI                                 | 239 | 26 (10.9)     | 238 | 28 (11.8)       | 239 | 38 (15.9)        | 239 | 43 (18.0)        | 0.081  |
| ARB                                  | 239 | 94 (39.3)     | 238 | 100 (42.0)      | 239 | 111 (46.4)       | 239 | 135 (56.5)       | <0.001 |
| β-blocker                            | 239 | 56 (23.4)     | 238 | 69 (29.0)       | 239 | 75 (31.4)        | 239 | 91 (38.1)        | 0.006  |
| Any lipid-lowering drug use          | 239 | 129 (54.0)    | 238 | 137 (57.6)      | 239 | 147 (61.5)       | 239 | 124 (51.9)       | 0.157  |
| Statin use                           | 239 | 115 (48.1)    | 238 | 122 (51.3)      | 239 | 133 (55.7)       | 239 | 110 (46.0)       | 0.170  |
| Any hypoglycemic drug use            | 239 | 51 (21.3)     | 238 | 65 (27.3)       | 239 | 67 (28.0)        | 239 | 90 (37.7)        | 0.001  |
| Oral hypoglycemic drugs              | 239 | 43 (18.0)     | 238 | 55 (23.1)       | 239 | 54 (22.6)        | 239 | 71 (29.7)        | 0.025  |
| Insulin                              | 239 | 17 (7.1)      | 238 | 23 (9.7)        | 239 | 26 (10.9)        | 239 | 37 (15.5)        | 0.028  |
| Any anti-platelet drug use           | 239 | 131 (54.8)    | 238 | 130 (54.6)      | 239 | 149 (62.3)       | 239 | 131 (54.8)       | 0.240  |
| Aspirin use                          | 239 | 127 (53.1)    | 238 | 111 (46.6)      | 239 | 129 (54.0)       | 239 | 121 (50.6)       | 0.376  |
| Any anti-coagulant drugs             | 239 | 22 (9.2)      | 238 | 29 (12.2)       | 239 | 52 (21.8)        | 239 | 52 (21.8)        | <0.001 |

|                                                      |     |          |     |          |     |           |     |           |        |
|------------------------------------------------------|-----|----------|-----|----------|-----|-----------|-----|-----------|--------|
| Warfarin                                             | 239 | 19 (8.0) | 238 | 22 (9.2) | 239 | 41 (17.2) | 239 | 46 (19.3) | <0.001 |
| <i>Incidence of events, no. (/1000 person-years)</i> |     |          |     |          |     |           |     |           |        |
| All-cause death                                      | 239 | 5 (7.1)  | 238 | 6 (8.6)  | 239 | 16 (22.8) | 239 | 59 (93.8) | –      |
| Cardiovascular death                                 | 239 | 0 (0.0)  | 238 | 2 (2.9)  | 239 | 4 (5.7)   | 239 | 18 (28.6) | –      |
| Myocardial infarction                                | 239 | 1 (1.4)  | 238 | 1 (1.4)  | 239 | 2 (2.9)   | 239 | 1 (1.6)   | –      |
| Stroke                                               | 239 | 6 (8.6)  | 238 | 5 (7.2)  | 239 | 3 (4.3)   | 239 | 10 (16.1) | –      |
| First MACE**                                         | 239 | 7 (10.0) | 238 | 7 (10.1) | 239 | 8 (11.4)  | 239 | 28 (45.3) | –      |

Values are expressed as number (percentage) unless otherwise indicated. The quartiles of GDF-15 levels were as follows: quartile 1,  $\leq 837.9$ ; quartile 2, 838.1–1230.1; quartile 3, 1231.2–1927.2; quartile 4,  $\geq 1928.1$  pg/mL. GDF-15 indicates growth differentiation factor-15; SD, standard deviation; eGFR, estimated glomerular filtration rate; CAD, coronary artery disease; IQR, interquartile range; LMT, left main trunk; NYHA, New York Heart Association; MI, myocardial infarction; PCI, percutaneous coronary intervention; CABG, coronary artery bypass grafting; CHF, congestive heart failure; NT-proBNP, N-terminal pro-brain natriuretic peptide; cTnI, contemporary sensitive cardiac troponin I; hs-CRP, high-sensitivity C-reactive protein; LDL, low-density lipoprotein; HDL, high-density lipoprotein; RASI, renin angiotensin system inhibitors; ACEI, angiotensin converting enzyme inhibitors; ARB, angiotensin receptor blockers; MACE, major adverse cardiovascular events.

\*The *P* value is for comparison between groups, and is based on the  $\chi^2$  test of independence for categorical variables, and the analysis of variance or Kruskal-Wallis for continuous variables.

†Obesity is defined as a body mass index of 25 or more.

‡Chronic kidney disease is defined as an estimated GFR of less than 60 ml/min/1.73 m<sup>2</sup> of body surface area. eGFRs of stages 3a, 3b, 4, and 5 are defined as follows: stage 3a, 45–59 ml/min/1.73 m<sup>2</sup>; stage 3b, 30–44 ml/min/1.73 m<sup>2</sup>; stage 4, 15–29 ml/min/1.73 m<sup>2</sup>; stage 5,  $\leq 14$  ml/min/1.73 m<sup>2</sup>.

§The Gensini score represents the angiographic severity of coronary artery disease employing a nonlinear points system for degree of luminal narrowing.

||Anemia is defined as a hemoglobin level of less than 13 g/dL in men and less than 12 g/dL in women.

#Previous cardiovascular events include myocardial infarction, stroke, heart failure hospitalization, and coronary revascularization.

\*\*MACE is defined as a composite of cardiovascular death, nonfatal myocardial infarction, and nonfatal stroke.

**Table S4. Baseline characteristics and incidence of outcomes according to quartiles of GDF-15 in former smokers.**

| Baseline characteristics and incidence of events | Quartile 1 |                 | Quartile 2 |                 | Quartile 3 |                 | Quartile 4 |                 | P value* |
|--------------------------------------------------|------------|-----------------|------------|-----------------|------------|-----------------|------------|-----------------|----------|
|                                                  | No.        | Value           | No.        | Value           | No.        | Value           | No.        | Value           |          |
| <i>Baseline characteristics</i>                  |            |                 |            |                 |            |                 |            |                 |          |
| Age, mean (SD), y                                | 258        | 65.5 (9.3)      | 259        | 71.6 (8.1)      | 259        | 74.4 (7.4)      | 259        | 75.7 (7.8)      | <0.001   |
| Male                                             | 258        | 215 (83.3)      | 259        | 229 (88.4)      | 259        | 217 (83.8)      | 259        | 229 (88.4)      | 0.165    |
| Body mass index, mean (SD)                       | 258        | 24.8 (3.4)      | 259        | 24.3 (3.5)      | 259        | 24.3 (3.8)      | 259        | 23.7 (3.6)      | 0.007    |
| Obesity <sup>†</sup>                             | 258        | 108 (41.9)      | 259        | 94 (36.3)       | 259        | 106 (40.9)      | 259        | 87 (33.6)       | 0.171    |
| Hypertension                                     | 258        | 197 (76.4)      | 259        | 197 (76.1)      | 259        | 208 (80.3)      | 259        | 214 (82.6)      | 0.194    |
| Dyslipidemia                                     | 258        | 177 (68.6)      | 259        | 173 (66.8)      | 259        | 163 (62.9)      | 259        | 142 (54.8)      | 0.006    |
| Diabetes                                         | 258        | 101 (39.2)      | 259        | 129 (49.8)      | 259        | 116 (44.8)      | 259        | 146 (56.4)      | <0.001   |
| Current smoker                                   | 258        | 0 (0.0)         | 259        | 0 (0.0)         | 259        | 0 (0.0)         | 259        | 0 (0.0)         | –        |
| Former smoker                                    | 239        | 239 (100)       | 238        | 238 (100)       | 239        | 239 (100)       | 239        | 239 (100)       | –        |
| eGFR, mean (SD), ml/min/1.73 m <sup>2</sup>      | 258        | 74.4 (17.8)     | 259        | 67.5 (16.4)     | 259        | 63.0 (15.8)     | 259        | 43.9 (23.5)     | <0.001   |
| Chronic kidney disease <sup>‡</sup>              | 258        | 50 (19.4)       | 259        | 87 (33.6)       | 259        | 114 (44.0)      | 259        | 198 (76.5)      | <0.001   |
| Stage 3a                                         |            | 42 (16.3)       |            | 72 (27.8)       |            | 81 (31.3)       |            | 63 (24.3)       |          |
| Stage 3b                                         |            | 7 (2.7)         |            | 13 (5.0)        |            | 31 (12.0)       |            | 64 (24.7)       |          |
| Stage 4                                          |            | 0 (0.0)         |            | 1 (0.4)         |            | 2 (0.8)         |            | 34 (13.1)       |          |
| Stage 5                                          |            | 1 (0.4)         |            | 1 (0.4)         |            | 0 (0.0)         |            | 37 (14.3)       |          |
| Dialysis                                         | 258        | 0 (0)           | 259        | 1 (0.4)         | 259        | 0 (0.0)         | 259        | 35 (13.5)       | <0.001   |
| Gensini score, median (IQR) <sup>§</sup>         | 258        | 10.5 (2.5-31.9) | 259        | 15.5 (5.0-38.5) | 259        | 18.0 (4.5-43.5) | 259        | 16.5 (5.0-52.0) | 0.005    |
| Obstructive CAD                                  | 258        | 145 (56.2)      | 259        | 168 (64.9)      | 259        | 172 (66.4)      | 259        | 171 (66.0)      | 0.051    |
| Multi-vessel or LMT disease                      | 258        | 83 (32.2)       | 259        | 86 (33.2)       | 259        | 96 (37.1)       | 259        | 108 (41.7)      | 0.098    |

|                                             |     |              |     |              |     |               |     |              |        |
|---------------------------------------------|-----|--------------|-----|--------------|-----|---------------|-----|--------------|--------|
| NYHA class III or IV                        | 258 | 10 (3.9)     | 259 | 14 (5.4)     | 259 | 20 (7.7)      | 259 | 44 (17.0)    | <0.001 |
| Atrial fibrillation                         | 258 | 15 (5.8)     | 259 | 23 (8.9)     | 259 | 24 (9.3)      | 259 | 42 (16.2)    | <0.001 |
| Malignancies                                | 258 | 18 (7.0)     | 259 | 28 (10.8)    | 259 | 34 (13.1)     | 259 | 42 (16.2)    | 0.010  |
| Anemia <sup>ll</sup>                        | 258 | 18 (7.0)     | 259 | 28 (10.8)    | 259 | 34 (13.1)     | 259 | 42 (16.2)    | 0.010  |
| Previous MI                                 | 258 | 51 (19.8)    | 259 | 51 (19.7)    | 259 | 37 (14.3)     | 259 | 56 (21.6)    | 0.165  |
| Previous PCI                                | 258 | 80 (31.0)    | 259 | 84 (32.4)    | 259 | 78 (30.1)     | 259 | 79 (30.5)    | 0.946  |
| Previous CABG                               | 258 | 8 (3.1)      | 259 | 9 (3.5)      | 259 | 14 (5.4)      | 259 | 18 (7.0)     | 0.138  |
| Previous CAD (MI, PCI, or CABG)             | 258 | 88 (34.1)    | 259 | 92 (35.5)    | 259 | 91 (35.1)     | 259 | 98 (37.8)    | 0.840  |
| Previous stroke                             | 258 | 27 (10.5)    | 259 | 47 (18.2)    | 259 | 46 (17.8)     | 259 | 53 (20.5)    | 0.015  |
| Precious CHF hospitalization                | 258 | 7 (2.7)      | 259 | 16 (6.2)     | 259 | 23 (8.9)      | 259 | 58 (22.4)    | <0.001 |
| Previous cardiovascular events <sup>#</sup> | 258 | 113 (43.8)   | 259 | 136 (52.5)   | 259 | 134 (51.7)    | 259 | 155 (59.9)   | 0.004  |
| Family history of cardiovascular events     | 258 | 87 (33.7)    | 259 | 85 (32.8)    | 259 | 84 (32.4)     | 259 | 64 (24.7)    | 0.096  |
| Systolic blood pressure, mean (SD), mmHg    | 258 | 129 (18)     | 259 | 126 (17)     | 259 | 128 (19)      | 259 | 127 (19)     | 0.455  |
| Diastolic blood pressure, mean (SD), mmHg   | 258 | 73 (11)      | 259 | 69 (12)      | 259 | 70 (12)       | 259 | 69 (12)      | <0.001 |
| Pulse rate, mean (SD), beats per minute     | 258 | 68 (11)      | 259 | 69 (12)      | 259 | 71 (13)       | 259 | 73 (14)      | <0.001 |
| LDL-cholesterol, mean (SD), mg/dL           | 247 | 109 (30)     | 254 | 104 (26)     | 257 | 102 (29)      | 255 | 93 (27)      | <0.001 |
| HDL-cholesterol, mean (SD), mg/dL           | 253 | 53 (15)      | 254 | 54 (17)      | 249 | 55 (15)       | 254 | 51 (15)      | 0.012  |
| Triglycerides, median (IQR), mg/dL          | 253 | 127 (91-199) | 255 | 115 (84-171) | 255 | 115 (81-153)  | 256 | 102 (75-144) | <0.001 |
| Fasting glucose, median (IQR), mg/dL        | 253 | 107 (96-130) | 257 | 116 (97-154) | 258 | 114 (100-147) | 256 | 112 (95-155) | 0.012  |

|                                 |     |               |     |                  |     |                  |     |                  |        |
|---------------------------------|-----|---------------|-----|------------------|-----|------------------|-----|------------------|--------|
| Hemoglobin A1c, median (IQR), % | 244 | 5.9 (5.6-6.8) | 248 | 6.2 (5.7-7.3)    | 250 | 6.1 (5.7-7.1)    | 247 | 6.2 (5.7-7.3)    | 0.047  |
| Creatinine, median (IQR), mg/dL | 258 | 0.8 (0.7-0.9) | 259 | 0.9 (0.7-1.0)    | 259 | 0.9 (0.8-1.0)    | 259 | 1.2 (0.9-1.8)    | <0.001 |
| Hemoglobin, mean (SD), g/dL     | 257 | 13.9 (1.3)    | 258 | 13.6 (1.5)       | 259 | 13.2 (1.6)       | 259 | 11.9 (2.0)       | <0.001 |
| Hematocrit, mean (SD), %        | 257 | 41.3 (3.9)    | 258 | 40.7 (4.2)       | 259 | 39.6 (4.6)       | 259 | 35.9 (6.0)       | <0.001 |
| Uric acid, mean (SD), mg/dL     | 250 | 6.0 (1.5)     | 253 | 5.8 (1.4)        | 253 | 6.1 (1.7)        | 248 | 6.3 (1.9)        | 0.003  |
| NT-proBNP, median (IQR), pg/mL  | 258 | 87 (40-213)   | 259 | 148 (61-394)     | 259 | 188 (77-653)     | 259 | 732 (217-2436)   | <0.001 |
| cTnl, median (IQR), pg/mL       | 258 | 0.0 (0.0-1.0) | 259 | 0.0 (0.0-7.0)    | 259 | 0.0 (0.0-10.0)   | 259 | 8.0 (0.0-33.0)   | <0.001 |
| hs-CRP, median (IQR), mg/L      | 258 | 0.5 (0.2-1.7) | 259 | 0.6 (0.3-2.0)    | 259 | 1.0 (0.4-3.2)    | 259 | 1.5 (0.4-5.7)    | <0.001 |
| GDF-15, median (IQR), pg/mL     | 258 | 739 (608-856) | 259 | 1172 (1069-1274) | 259 | 1617 (1512-1765) | 259 | 2747 (2200-4084) | <0.001 |
| Anti-hypertensive drug use      | 258 | 203 (78.7)    | 259 | 204 (78.8)       | 259 | 209 (80.7)       | 259 | 222 (85.7)       | 0.139  |
| RASI                            | 258 | 136 (52.7)    | 259 | 156 (60.2)       | 259 | 162 (62.6)       | 259 | 172 (66.4)       | 0.013  |
| ACEI                            | 258 | 39 (15.1)     | 259 | 38 (14.7)        | 259 | 35 (13.5)        | 259 | 64 (24.7)        | 0.002  |
| ARB                             | 258 | 99 (38.4)     | 259 | 124 (47.9)       | 259 | 127 (49.0)       | 259 | 124 (47.9)       | 0.052  |
| β-blocker                       | 258 | 73 (28.3)     | 259 | 73 (28.2)        | 259 | 65 (25.1)        | 259 | 86 (33.2)        | 0.234  |
| Any lipid-lowering drug use     | 258 | 158 (61.2)    | 259 | 157 (60.6)       | 259 | 155 (59.9)       | 259 | 140 (54.1)       | 0.320  |
| Statin use                      | 258 | 145 (56.2)    | 259 | 141 (54.4)       | 259 | 128 (49.4)       | 259 | 117 (45.2)       | 0.051  |
| Any hypoglycemic drug use       | 258 | 74 (28.7)     | 259 | 92 (35.5)        | 259 | 85 (32.8)        | 259 | 91 (35.1)        | 0.327  |
| Oral hypoglycemic drugs         | 258 | 67 (26.0)     | 259 | 75 (29.0)        | 259 | 68 (26.3)        | 259 | 62 (23.9)        | 0.636  |
| Insulin                         | 258 | 16 (6.2)      | 259 | 31 (12.0)        | 259 | 33 (12.7)        | 259 | 44 (17.0)        | 0.002  |
| Any anti-platelet drug use      | 258 | 177 (68.6)    | 259 | 189 (73.0)       | 259 | 172 (66.4)       | 259 | 168 (64.9)       | 0.217  |
| Aspirin use                     | 258 | 163 (63.2)    | 259 | 171 (66.0)       | 259 | 150 (57.9)       | 259 | 140 (54.1)       | 0.026  |
| Any anti-coagulant drugs        | 258 | 24 (9.3)      | 259 | 39 (15.1)        | 259 | 44 (17.0)        | 259 | 59 (22.8)        | <0.001 |
| Warfarin                        | 258 | 18 (7.0)      | 259 | 35 (13.5)        | 259 | 39 (15.1)        | 259 | 55 (21.2)        | <0.001 |

| <i>Incidence of events, no. (/1000 person-years)</i> |     |          |     |           |     |           |     |            |   |
|------------------------------------------------------|-----|----------|-----|-----------|-----|-----------|-----|------------|---|
| All-cause death                                      | 258 | 7 (9.3)  | 259 | 13 (17.1) | 259 | 24 (32.0) | 259 | 76 (116.2) | – |
| Cardiovascular death                                 | 258 | 2 (2.7)  | 259 | 6 (7.9)   | 259 | 7 (9.3)   | 259 | 32 (48.9)  | – |
| Myocardial infarction                                | 258 | 1 (1.3)  | 259 | 1 (1.3)   | 259 | 2 (2.7)   | 259 | 6 (9.2)    | – |
| Stroke                                               | 258 | 5 (6.7)  | 259 | 10 (13.6) | 259 | 6 (8.1)   | 259 | 10 (15.5)  | – |
| First MACE**                                         | 258 | 8 (10.7) | 259 | 16 (21.8) | 259 | 14 (18.9) | 259 | 42 (65.5)  | – |

Values are expressed as number (percentage) unless otherwise indicated. The quartiles of GDF-15 levels were as follows: quartile 1,  $\leq 973.0$ ; quartile 2, 982.6–1371.3; quartile 3, 1373.0–1980.2; quartile 4,  $\geq 1980.9$  pg/mL. GDF-15 indicates growth differentiation factor-15; SD, standard deviation; eGFR, estimated glomerular filtration rate; CAD, coronary artery disease; IQR, interquartile range; LMT, left main trunk; NYHA, New York Heart Association; MI, myocardial infarction; PCI, percutaneous coronary intervention; CABG, coronary artery bypass grafting; CHF, congestive heart failure; NT-proBNP, N-terminal pro-brain natriuretic peptide; cTnI, contemporary sensitive cardiac troponin I; hs-CRP, high-sensitivity C-reactive protein; LDL, low-density lipoprotein; HDL, high-density lipoprotein; RASI, renin angiotensin system inhibitors; ACEI, angiotensin converting enzyme inhibitors; ARB, angiotensin receptor blockers; MACE, major adverse cardiovascular events.

\*The *P* value is for comparison between groups, and is based on the  $\chi^2$  test of independence for categorical variables, and the analysis of variance or Kruskal-Wallis for continuous variables.

†Obesity is defined as a body mass index of 25 or more.

‡Chronic kidney disease is defined as an estimated GFR of less than 60 ml/min/1.73 m<sup>2</sup> of body surface area. eGFRs of stages 3a, 3b, 4, and 5 are defined as follows: stage 3a, 45–59 ml/min/1.73 m<sup>2</sup>; stage 3b, 30–44 ml/min/1.73 m<sup>2</sup>; stage 4, 15–29 ml/min/1.73 m<sup>2</sup>; stage 5,  $\leq 14$  ml/min/1.73 m<sup>2</sup>.

§The Gensini score represents the angiographic severity of coronary artery disease employing a nonlinear points system for degree of luminal narrowing.

||Anemia is defined as a hemoglobin level of less than 13 g/dL in men and less than 12 g/dL in women.

#Previous cardiovascular events include myocardial infarction, stroke, heart failure hospitalization, and coronary revascularization.

\*\*MACE is defined as a composite of cardiovascular death, nonfatal myocardial infarction, and nonfatal stroke.



**Table S5. Baseline characteristics and incidence of outcomes according to quartiles of GDF-15 in current smokers.**

| Baseline characteristics and incidence of events | Quartile 1 |                | Quartile 2 |                 | Quartile 3 |                 | Quartile 4 |                 | P value* |
|--------------------------------------------------|------------|----------------|------------|-----------------|------------|-----------------|------------|-----------------|----------|
|                                                  | No.        | Value          | No.        | Value           | No.        | Value           | No.        | Value           |          |
| <i>Baseline characteristics</i>                  |            |                |            |                 |            |                 |            |                 |          |
| Age, mean (SD), y                                | 107        | 56.6 (12.1)    | 107        | 65.4 (9.3)      | 107        | 69.8 (9.2)      | 107        | 70.3 (9.1)      | <0.001   |
| Male                                             | 107        | 92 (86.0)      | 107        | 89 (83.2)       | 107        | 91 (85.1)       | 107        | 91 (85.1)       | 0.951    |
| Body mass index, mean (SD)                       | 107        | 25.1 (4.0)     | 107        | 25.1 (3.9)      | 107        | 24.4 (4.2)      | 107        | 22.9 (3.7)      | <0.001   |
| Obesity <sup>†</sup>                             | 107        | 50 (46.7)      | 107        | 54 (50.5)       | 107        | 40 (37.4)       | 107        | 32 (29.9)       | 0.010    |
| Hypertension                                     | 107        | 68 (63.6)      | 107        | 86 (80.4)       | 107        | 81 (75.7)       | 107        | 88 (82.2)       | 0.007    |
| Dyslipidemia                                     | 107        | 72 (67.3)      | 107        | 61 (57.0)       | 107        | 56 (52.3)       | 107        | 59 (55.1)       | 0.133    |
| Diabetes                                         | 107        | 40 (37.4)      | 107        | 45 (42.1)       | 107        | 57 (53.3)       | 107        | 64 (59.8)       | 0.004    |
| Current smoker                                   | 107        | 107 (100.0)    | 107        | 107 (100.0)     | 107        | 107 (100.0)     | 107        | 107 (100.0)     | –        |
| Former smoker                                    | 107        | 0 (0.0)        | 107        | 0 (0.0)         | 107        | 0 (0.0)         | 107        | 0 (0.0)         | –        |
| eGFR, mean (SD), ml/min/1.73 m <sup>2</sup>      | 107        | 80.5 (20.2)    | 107        | 73.9 (17.4)     | 107        | 62.1 (16.2)     | 107        | 51.1 (25.7)     | <0.001   |
| Chronic kidney disease <sup>‡</sup>              | 107        | 10 (9.4)       | 107        | 21 (19.6)       | 107        | 54 (50.5)       | 107        | 68 (63.6)       | <0.001   |
| Stages of chronic kidney disease                 | 107        |                | 107        |                 | 107        |                 | 107        |                 | <0.001   |
| Stage 3a                                         |            | 7 (6.5)        |            | 20 (18.7)       |            | 38 (35.5)       |            | 31 (29.0)       |          |
| Stage 3b                                         |            | 3 (2.8)        |            | 1 (0.9)         |            | 15 (14.0)       |            | 14 (13.1)       |          |
| Stage 4                                          |            | 0 (0.0)        |            | 0 (0.0)         |            | 1 (0.9)         |            | 10 (9.4)        |          |
| Stage 5                                          |            | 0 (0.0)        |            | 0 (0.0)         |            | 0 (0.0)         |            | 13 (12.2)       |          |
| Dialysis                                         | 107        | 0 (0.0)        | 107        | 0 (0.0)         | 107        | 0 (0.0)         | 107        | 13 (12.2)       | <0.001   |
| Gensini score, median (IQR) <sup>§</sup>         | 107        | 8.0 (0.0-31.0) | 107        | 10.0 (2.0-34.0) | 107        | 15.5 (3.5-39.0) | 107        | 18.0 (2.5-49.0) | 0.050    |
| Obstructive CAD                                  | 107        | 55 (51.4)      | 107        | 56 (52.3)       | 107        | 67 (62.6)       | 107        | 68 (63.6)       | 0.136    |

|                                             |     |               |     |               |     |              |     |              |        |
|---------------------------------------------|-----|---------------|-----|---------------|-----|--------------|-----|--------------|--------|
| Multi-vessel or LMT disease                 | 107 | 30 (28.0)     | 107 | 33 (30.8)     | 107 | 42 (39.3)    | 107 | 52 (48.6)    | 0.008  |
| NYHA class III or IV                        | 107 | 5 (4.7)       | 107 | 9 (8.4)       | 107 | 10 (9.4)     | 107 | 27 (25.2)    | <0.001 |
| Atrial fibrillation                         | 107 | 7 (6.5)       | 107 | 8 (7.5)       | 107 | 9 (8.4)      | 107 | 16 (15.0)    | 0.138  |
| Malignancies                                | 107 | 5 (4.7)       | 107 | 7 (6.5)       | 107 | 11 (10.3)    | 107 | 13 (12.2)    | 0.183  |
| Anemia <sup>ll</sup>                        | 107 | 15 (14.0)     | 107 | 21 (19.6)     | 107 | 34 (31.8)    | 107 | 69 (64.5)    | <0.001 |
| Previous MI                                 | 107 | 12 (11.2)     | 107 | 21 (19.6)     | 107 | 12 (11.2)    | 107 | 16 (15.0)    | 0.242  |
| Previous PCI                                | 107 | 18 (16.8)     | 107 | 29 (27.1)     | 107 | 27 (25.2)    | 107 | 22 (20.6)    | 0.264  |
| Previous CABG                               | 107 | 2 (1.9)       | 107 | 0 (0.0)       | 107 | 2 (1.9)      | 107 | 4 (3.7)      | 0.253  |
| Previous CAD (MI, PCI, or CABG)             | 107 | 20 (18.7)     | 107 | 31 (29.0)     | 107 | 27 (25.2)    | 107 | 28 (26.2)    | 0.353  |
| Previous stroke                             | 107 | 11 (10.3)     | 107 | 18 (16.8)     | 107 | 19 (17.8)    | 107 | 16 (15.0)    | 0.425  |
| Precious CHF hospitalization                | 107 | 5 (4.7)       | 107 | 7 (6.5)       | 107 | 9 (8.4)      | 107 | 15 (14.0)    | 0.079  |
| Previous cardiovascular events <sup>#</sup> | 107 | 36 (33.6)     | 107 | 45 (42.1)     | 107 | 48 (44.9)    | 107 | 44 (41.1)    | 0.383  |
| Family history of cardiovascular events     | 107 | 39 (36.5)     | 107 | 28 (26.2)     | 107 | 23 (21.5)    | 107 | 23 (21.5)    | 0.042  |
| Systolic blood pressure, mean (SD), mmHg    | 107 | 126 (18)      | 107 | 130 (19)      | 107 | 125 (17)     | 107 | 124 (19)     | 0.100  |
| Diastolic blood pressure, mean (SD), mmHg   | 107 | 74 (14)       | 107 | 73 (14)       | 107 | 70 (11)      | 107 | 68 (12)      | 0.001  |
| Pulse rate, mean (SD), beats per minute     | 107 | 69 (12)       | 107 | 69 (13)       | 107 | 71 (14)      | 107 | 73 (13)      | 0.058  |
| LDL-cholesterol, mean (SD), mg/dL           | 103 | 115 (35)      | 104 | 107 (29)      | 107 | 107 (31)     | 107 | 99 (31)      | 0.003  |
| HDL-cholesterol, mean (SD), mg/dL           | 104 | 50 (15)       | 103 | 52 (14)       | 106 | 51 (16)      | 105 | 48 (15)      | 0.387  |
| Triglycerides, median (IQR), mg/dL          | 106 | 162 (103-236) | 105 | 128 (102-182) | 107 | 110 (83-177) | 107 | 113 (84-165) | <0.001 |

|                                      |     |               |     |                  |     |                  |     |                  |        |
|--------------------------------------|-----|---------------|-----|------------------|-----|------------------|-----|------------------|--------|
| Fasting glucose, median (IQR), mg/dL | 103 | 107 (95-143)  | 106 | 115 (97-152)     | 106 | 113 (95-142)     | 104 | 116 (94-165)     | 0.500  |
| Hemoglobin A1c, median (IQR), %      | 103 | 5.9 (5.6-6.8) | 105 | 6.1 (5.5-7.2)    | 106 | 6.4 (5.7-7.2)    | 104 | 6.4 (5.7-7.1)    | 0.145  |
| Creatinine, median (IQR), mg/dL      | 107 | 0.8 (0.7-0.9) | 107 | 0.8 (0.7-0.9)    | 107 | 0.9 (0.8-1.1)    | 107 | 1.1 (0.8-1.4)    | <0.001 |
| Hemoglobin, mean (SD), g/dL          | 107 | 14.6 (1.7)    | 106 | 14.0 (1.5)       | 107 | 13.4 (1.7)       | 107 | 12.0 (2.1)       | <0.001 |
| Hematocrit, mean (SD), %             | 107 | 43.6 (4.9)    | 106 | 41.7 (4.5)       | 107 | 40.3 (5.0)       | 107 | 36.2 (6.3)       | <0.001 |
| Uric acid, mean (SD), mg/dL          | 105 | 6.0 (1.7)     | 103 | 5.8 (1.6)        | 103 | 6.3 (1.7)        | 104 | 6.7 (2.0)        | 0.001  |
| NT-proBNP, median (IQR), pg/mL       | 107 | 96 (38-423)   | 107 | 160 (53-460)     | 107 | 217 (87-727)     | 107 | 988 (245-2740)   | <0.001 |
| cTnl, median (IQR), pg/mL            | 107 | 0.0 (0.0-8.0) | 107 | 0.0 (0.0-11.0)   | 107 | 0.0 (0.0-13.0)   | 107 | 10.0 (0.0-37.0)  | <0.001 |
| hs-CRP, median (IQR), mg/L           | 107 | 1.0 (0.4-2.4) | 107 | 1.2 (0.4-4.6)    | 107 | 1.5 (0.4-5.7)    | 107 | 3.5 (0.9-8.0)    | <0.001 |
| GDF-15, median (IQR), pg/mL          | 107 | 689 (529-819) | 107 | 1116 (1038-1255) | 107 | 1659 (1480-1819) | 107 | 2767 (2327-4257) | <0.001 |
| Anti-hypertensive drug use           | 107 | 78 (72.9)     | 107 | 91 (85.1)        | 107 | 82 (76.6)        | 107 | 99 (92.5)        | <0.001 |
| RASI                                 | 107 | 52 (48.6)     | 107 | 63 (58.9)        | 107 | 63 (58.9)        | 107 | 74 (69.2)        | 0.025  |
| ACEI                                 | 107 | 11 (10.3)     | 107 | 24 (22.4)        | 107 | 17 (15.9)        | 107 | 25 (23.4)        | 0.043  |
| ARB                                  | 107 | 41 (38.3)     | 107 | 41 (38.3)        | 107 | 49 (45.8)        | 107 | 58 (54.2)        | 0.059  |
| β-blocker                            | 107 | 30 (28.0)     | 107 | 29 (27.1)        | 107 | 30 (28.0)        | 107 | 38 (35.5)        | 0.501  |
| Any lipid-lowering drug use          | 107 | 56 (52.3)     | 107 | 62 (57.9)        | 107 | 56 (52.3)        | 107 | 61 (57.0)        | 0.762  |
| Statin use                           | 107 | 50 (46.7)     | 107 | 56 (52.3)        | 107 | 54 (50.5)        | 107 | 51 (47.7)        | 0.837  |
| Any hypoglycemic drug use            | 107 | 25 (23.4)     | 107 | 33 (30.8)        | 107 | 42 (39.3)        | 107 | 45 (42.1)        | 0.016  |
| Oral hypoglycemic drugs              | 107 | 19 (17.8)     | 107 | 24 (22.4)        | 107 | 35 (32.7)        | 107 | 30 (28.0)        | 0.065  |
| Insulin                              | 107 | 10 (9.4)      | 107 | 15 (14.0)        | 107 | 11 (10.3)        | 107 | 22 (20.6)        | 0.069  |
| Any anti-platelet drug use           | 107 | 63 (58.9)     | 107 | 72 (67.3)        | 107 | 62 (57.9)        | 107 | 65 (60.8)        | 0.493  |
| Aspirin use                          | 107 | 59 (55.1)     | 107 | 65 (60.8)        | 107 | 50 (46.7)        | 107 | 54 (50.5)        | 0.193  |
| Any anti-coagulant drugs             | 107 | 12 (11.2)     | 107 | 9 (8.4)          | 107 | 13 (12.2)        | 107 | 28 (26.2)        | 0.001  |

|                                                      |     |          |     |          |     |           |     |           |       |
|------------------------------------------------------|-----|----------|-----|----------|-----|-----------|-----|-----------|-------|
| Warfarin                                             | 107 | 10 (9.4) | 107 | 9 (8.4)  | 107 | 12 (11.2) | 107 | 26 (24.3) | 0.002 |
| <i>Incidence of events, no. (/1000 person-years)</i> |     |          |     |          |     |           |     |           |       |
| All-cause death                                      | 107 | 6 (19.3) | 107 | 4 (12.7) | 107 | 10 (32.8) | 107 | 28 (98.9) | –     |
| Cardiovascular death                                 | 107 | 2 (6.4)  | 107 | 2 (6.3)  | 107 | 1 (3.3)   | 107 | 12 (42.4) | –     |
| Myocardial infarction                                | 107 | 1 (3.2)  | 107 | 1 (3.2)  | 107 | 2 (6.6)   | 107 | 2 (7.1)   | –     |
| Stroke                                               | 107 | 5 (16.4) | 107 | 3 (9.6)  | 107 | 2 (6.6)   | 107 | 4 (14.3)  | –     |
| First MACE**                                         | 107 | 8 (26.3) | 107 | 6 (19.3) | 107 | 5 (16.6)  | 107 | 16 (57.9) | –     |

Values are expressed as number (percentage) unless otherwise indicated. The quartiles of GDF-15 levels were as follows: quartile 1,  $\leq 927.0$ ; quartile 2, 928.0–1368.7; quartile 3, 1371.9–2087.3; quartile 4,  $\geq 2098.6$  pg/mL. GDF-15 indicates growth differentiation factor-15; SD, standard deviation; eGFR, estimated glomerular filtration rate; CAD, coronary artery disease; IQR, interquartile range; LMT, left main trunk; NYHA, New York Heart Association; MI, myocardial infarction; PCI, percutaneous coronary intervention; CABG, coronary artery bypass grafting; CHF, congestive heart failure; NT-proBNP, N-terminal pro-brain natriuretic peptide; cTnI, contemporary sensitive cardiac troponin I; hs-CRP, high-sensitivity C-reactive protein; LDL, low-density lipoprotein; HDL, high-density lipoprotein; RASI, renin angiotensin system inhibitors; ACEI, angiotensin converting enzyme inhibitors; ARB, angiotensin receptor blockers; MACE, major adverse cardiovascular events.

\*The *P* value is for comparison between groups, and is based on the  $\chi^2$  test of independence for categorical variables, and the analysis of variance or Kruskal-Wallis for continuous variables.

†Obesity is defined as a body mass index of 25 or more.

‡Chronic kidney disease is defined as an estimated GFR of less than 60 ml/min/1.73 m<sup>2</sup> of body surface area. eGFRs of stages 3a, 3b, 4, and 5 are defined as follows: stage 3a, 45–59 ml/min/1.73 m<sup>2</sup>; stage 3b, 30–44 ml/min/1.73 m<sup>2</sup>; stage 4, 15–29 ml/min/1.73 m<sup>2</sup>; stage 5,  $\leq 14$  ml/min/1.73 m<sup>2</sup>.

§The Gensini score represents the angiographic severity of coronary artery disease employing a nonlinear points system for degree of luminal narrowing.

||Anemia is defined as a hemoglobin level of less than 13 g/dL in men and less than 12 g/dL in women.

#Previous cardiovascular events include myocardial infarction, stroke, heart failure hospitalization, and coronary revascularization.

\*\*MACE is defined as a composite of cardiovascular death, nonfatal myocardial infarction, and nonfatal stroke.

**Figure S1. Cumulative incidence of cardiovascular death in the entire cohort (A), never smokers (B), former smokers (C), and current smokers (D) according to the serum GDF-15 level at baseline. Follow-up results are truncated after 3 years. GDF-15 indicates growth differentiation factor 15.**

A

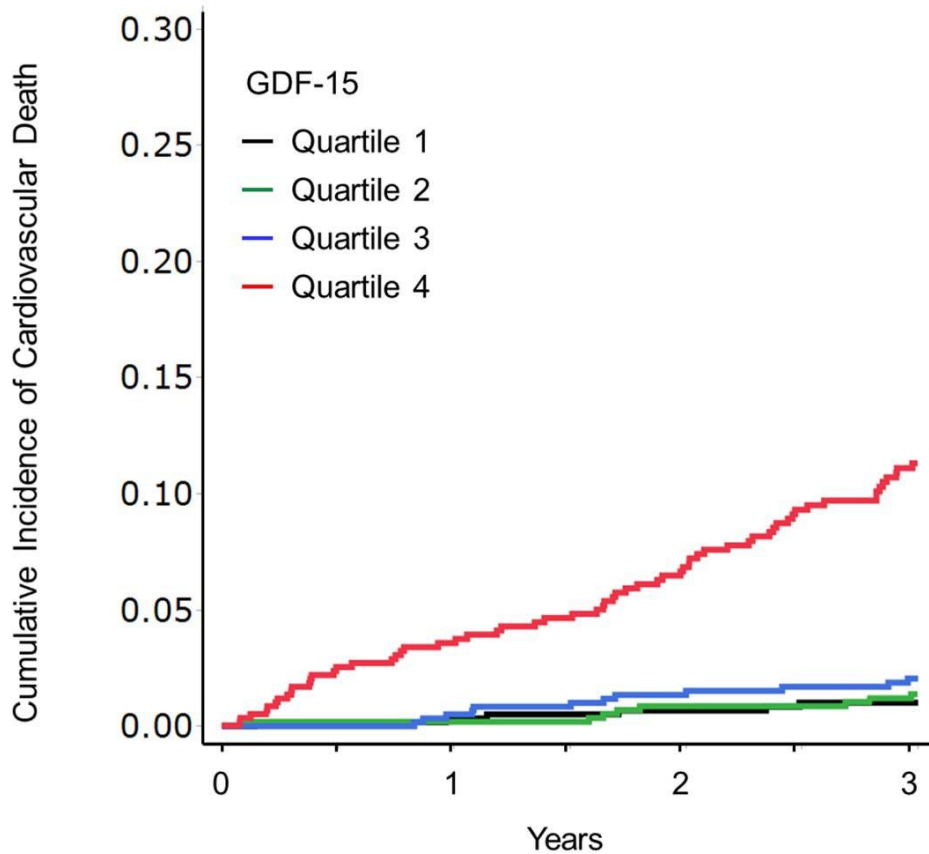

| No. at Risk |     |     |     |     |     |     |     |
|-------------|-----|-----|-----|-----|-----|-----|-----|
| Quartile 1  | 605 | 601 | 596 | 592 | 590 | 581 | 577 |
| Quartile 2  | 604 | 600 | 599 | 594 | 588 | 586 | 578 |
| Quartile 3  | 604 | 601 | 596 | 588 | 574 | 564 | 551 |
| Quartile 4  | 605 | 571 | 544 | 528 | 503 | 468 | 440 |

B

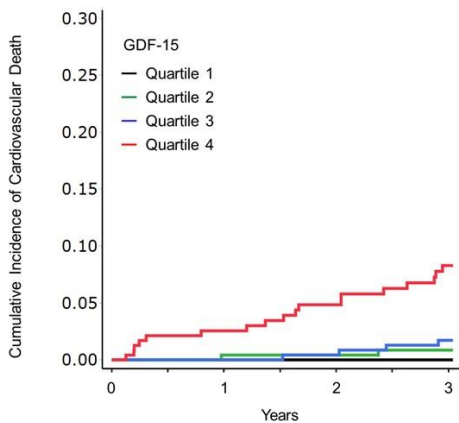

| No. at Risk |     |     |     |     |     |     |     |
|-------------|-----|-----|-----|-----|-----|-----|-----|
| Quartile 1  | 239 | 239 | 238 | 237 | 237 | 233 | 231 |
| Quartile 2  | 238 | 237 | 236 | 234 | 232 | 230 | 229 |
| Quartile 3  | 239 | 237 | 237 | 236 | 232 | 230 | 223 |
| Quartile 4  | 239 | 227 | 220 | 210 | 202 | 191 | 180 |

C

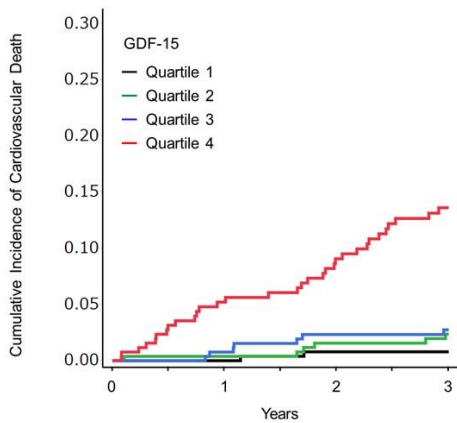

| No. at Risk |     |     |     |     |     |     |     |
|-------------|-----|-----|-----|-----|-----|-----|-----|
| Quartile 1  | 258 | 256 | 254 | 251 | 250 | 247 | 246 |
| Quartile 2  | 259 | 257 | 256 | 254 | 250 | 248 | 246 |
| Quartile 3  | 259 | 259 | 257 | 252 | 246 | 239 | 233 |
| Quartile 4  | 259 | 241 | 224 | 220 | 208 | 192 | 180 |

D

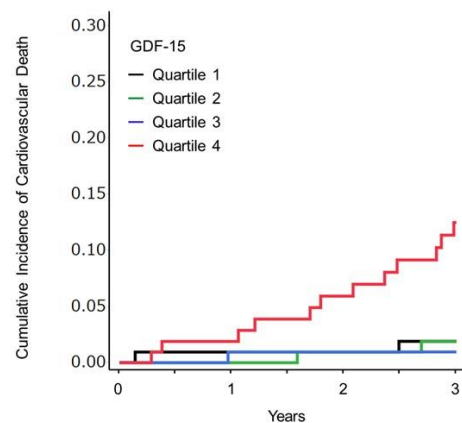

| No. at Risk |     |     |     |     |     |     |     |
|-------------|-----|-----|-----|-----|-----|-----|-----|
| Quartile 1  | 107 | 105 | 104 | 104 | 103 | 102 | 101 |
| Quartile 2  | 107 | 106 | 106 | 106 | 105 | 105 | 102 |
| Quartile 3  | 107 | 106 | 103 | 102 | 99  | 99  | 97  |
| Quartile 4  | 107 | 103 | 100 | 96  | 91  | 83  | 78  |

**Figure S2. Cumulative incidence of MACE in the entire cohort (A), never smokers (B), former smokers (C), and current smokers (D) according to the serum GDF-15 level at baseline. Follow-up results are truncated after 3 years. MACE indicates major adverse cardiovascular events; and GDF-15, growth differentiation factor 15.**

**A**

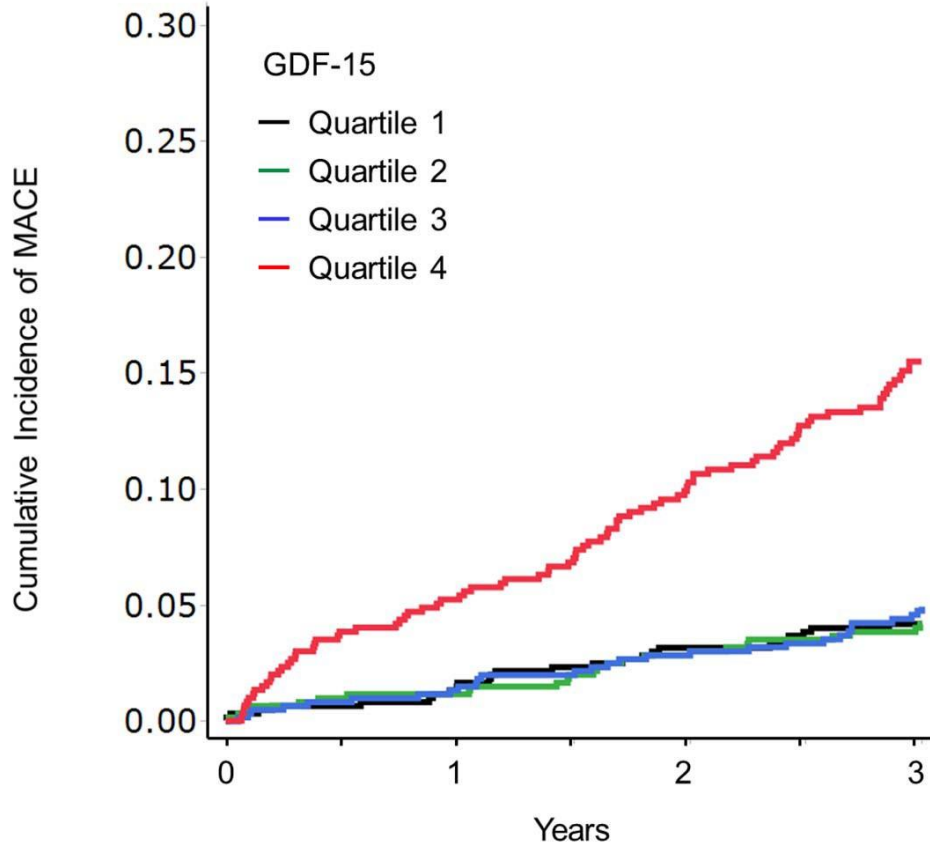

| No. at Risk |  | 0   | 0.5 | 1   | 1.5 | 2   | 2.5 | 3   |
|-------------|--|-----|-----|-----|-----|-----|-----|-----|
| Quartile 1  |  | 605 | 598 | 589 | 582 | 576 | 566 | 560 |
| Quartile 2  |  | 604 | 595 | 593 | 583 | 576 | 570 | 562 |
| Quartile 3  |  | 604 | 597 | 592 | 582 | 566 | 555 | 538 |
| Quartile 4  |  | 605 | 565 | 537 | 518 | 488 | 455 | 424 |

**B**

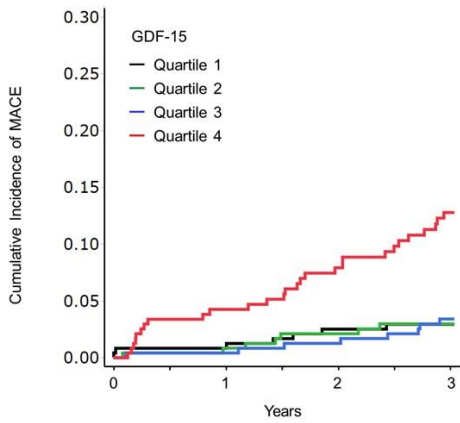

| No. at Risk |  | 0   | 0.5 | 1   | 1.5 | 2   | 2.5 | 3   |
|-------------|--|-----|-----|-----|-----|-----|-----|-----|
| Quartile 1  |  | 239 | 237 | 235 | 233 | 231 | 227 | 225 |
| Quartile 2  |  | 238 | 236 | 235 | 230 | 228 | 225 | 225 |
| Quartile 3  |  | 239 | 237 | 237 | 235 | 231 | 229 | 220 |
| Quartile 4  |  | 239 | 225 | 217 | 207 | 197 | 186 | 174 |

**C**

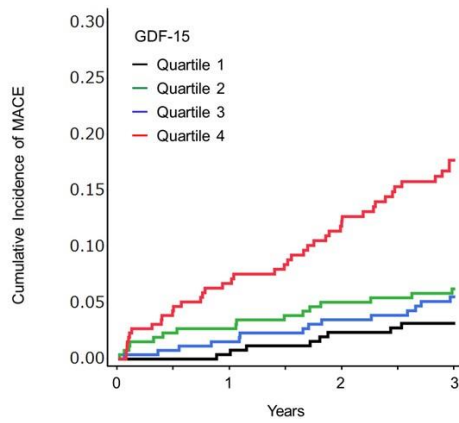

| No. at Risk |  | 0   | 0.5 | 1   | 1.5 | 2   | 2.5 | 3   |
|-------------|--|-----|-----|-----|-----|-----|-----|-----|
| Quartile 1  |  | 258 | 256 | 252 | 249 | 246 | 242 | 240 |
| Quartile 2  |  | 259 | 252 | 250 | 245 | 241 | 238 | 236 |
| Quartile 3  |  | 259 | 257 | 255 | 250 | 243 | 235 | 228 |
| Quartile 4  |  | 259 | 238 | 222 | 216 | 201 | 187 | 173 |

**D**

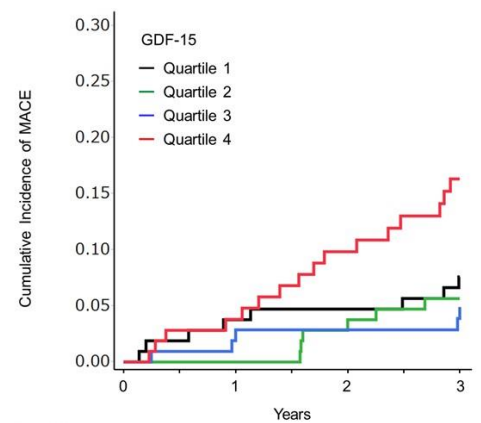

| No. at Risk |  | 0   | 0.5 | 1   | 1.5 | 2   | 2.5 | 3  |
|-------------|--|-----|-----|-----|-----|-----|-----|----|
| Quartile 1  |  | 107 | 104 | 102 | 101 | 100 | 99  | 96 |
| Quartile 2  |  | 107 | 106 | 106 | 106 | 103 | 101 | 98 |
| Quartile 3  |  | 107 | 105 | 102 | 100 | 97  | 97  | 94 |
| Quartile 4  |  | 107 | 102 | 98  | 93  | 88  | 80  | 75 |

**Figure S3. Adjusted hazard ratios of the quartiles of GDF-15 levels for all-cause death in the entire cohort, never smokers, former smokers, and current smokers.** The data were adjusted for age, sex, body mass index, hypertension, dyslipidemia, diabetes, and current smoking, eGFR, the Gensini score, previous myocardial infarction, previous stroke, previous heart failure hospitalization, malignancies, anemia, antihypertensive drug use, statin use, and cardiovascular biomarkers (NT-proBNP, cTnI, and hs-CRP). The biomarkers were modeled as continuous variables. CI indicates confidence interval; HR, hazard ratio; GDF-15, growth differentiation factor 15; eGFR, estimated glomerular filtration rate; NT-proBNP, N-terminal pro-brain natriuretic peptide; cTnI, contemporary sensitive cardiac troponin I; and hs-CRP, high-sensitivity C-reactive protein.

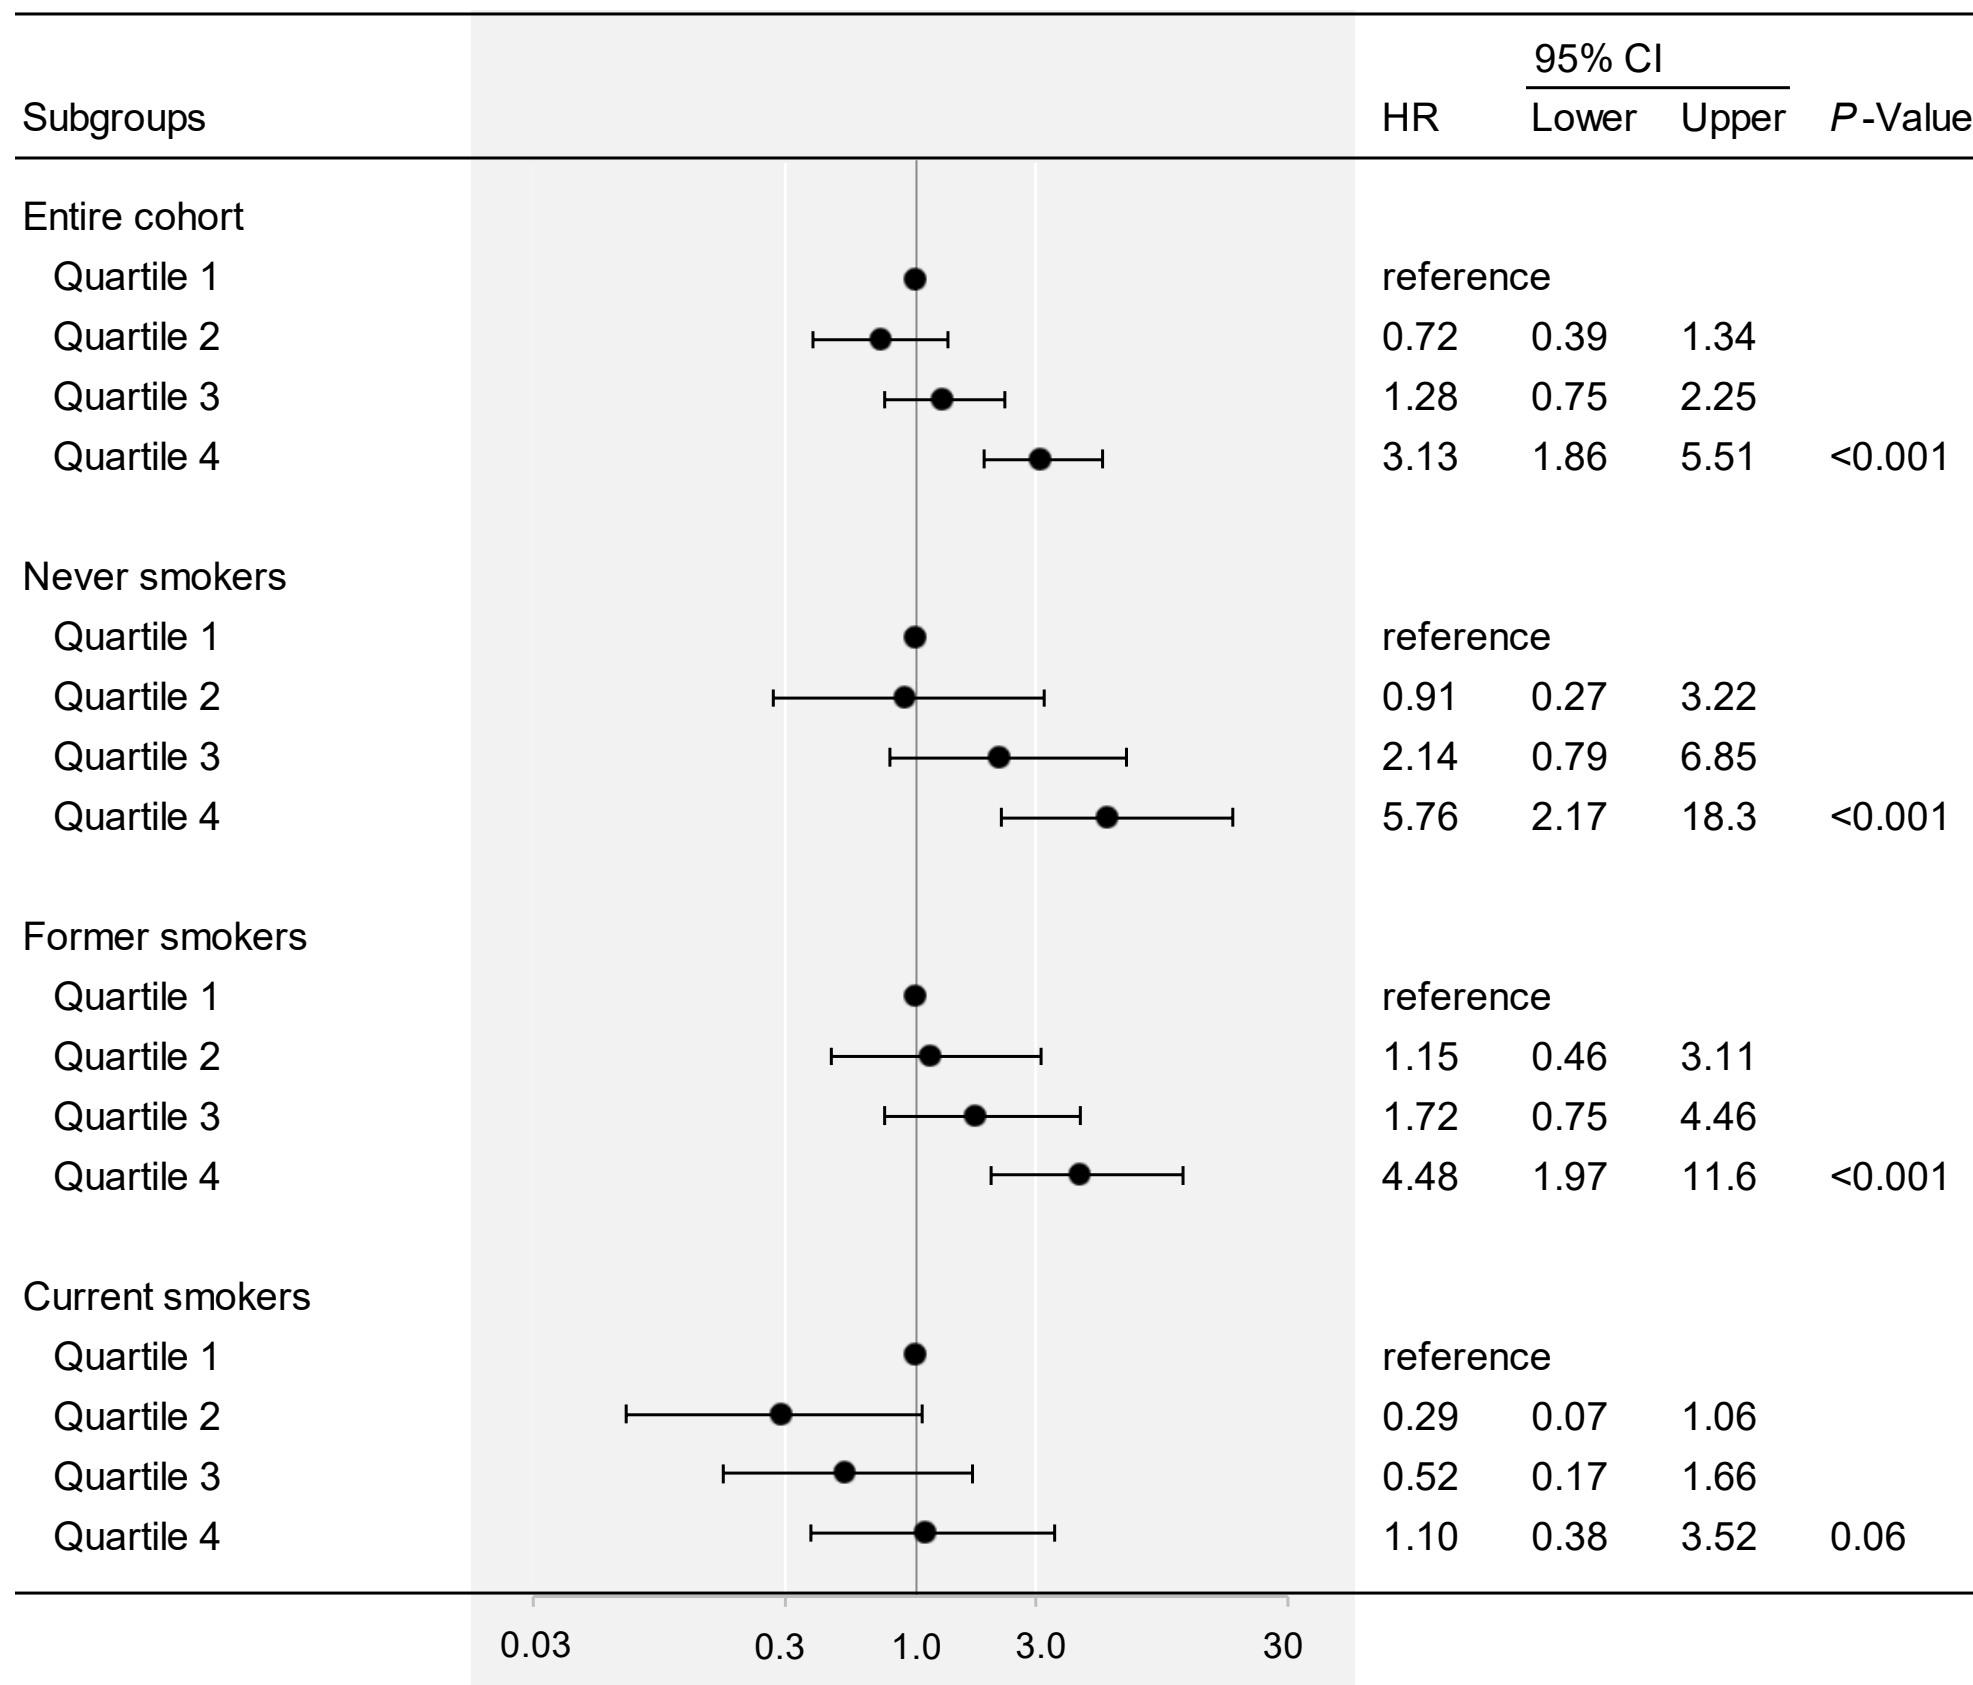

Supplement: JAH3-9-e018217-s001.pdf [file JAH3-9-e018217-s001.pdf]
